# Supplementary material for: Scalable complete conversion of MgCo 2 O 4 by mechanochemistry for high-performance supercapacitors
Source: Royal Society of Chemistry journal article supplement (doi:10.1039/d4qi02020k), 2024-01-01
Supplement: d4qi02020k1.pdf [file d4qi02020k1.pdf]

## Supplementary Information

### Scalable complete conversion of $\text{MgCo}_2\text{O}_4$ by mechanochemistry for high-performance supercapacitors

Zhiyuan Liu<sup>†,‡</sup>, Qixuan Xiang<sup>†,‡</sup>, Hao Zhang<sup>†,‡</sup>, Xianglong Zhang<sup>†,‡</sup>, Huijun Tan<sup>†,‡\*</sup>,  
Yaping Zhao<sup>†,‡\*</sup>

<sup>†</sup>School of Chemistry and Chemical Engineering, Frontiers Science Center for  
Transformative Molecules, Shanghai Jiao Tong University, Shanghai 200240, People's  
Republic of China

<sup>‡</sup>Inner Mongolia Research Institute, Shanghai Jiao Tong University, Inner Mongolia  
010052, People's Republic of China

\*Corresponding authors: Dr. Huijun Tan, Prof. Yaping Zhao  
Email: sophie93@sjtu.edu.cn (H. Tan), ypzhaos@sjtu.edu.cn (Y. Zhao)

### **S1 The peaks detected in XRD and their corresponding phases**

The diffraction peaks at  $2\theta$  of  $19.1^\circ$ ,  $31.4^\circ$ ,  $37.0^\circ$ ,  $38.7^\circ$ ,  $44.9^\circ$ ,  $55.8^\circ$ ,  $59.4^\circ$ ,  $65.3^\circ$  and  $77.34^\circ$  correspond to the (111), (220), (311), (222), (400), (442), (511), (440), and (533) planes of standard  $\text{MgCo}_2\text{O}_4$  (JCPDS No. 81-0667), respectively<sup>1</sup>. The peaks at  $18.6^\circ$ ,  $38.0^\circ$ ,  $50.9^\circ$ , and  $58.6^\circ$  correspond to the (001), (101), (102), and (110) of  $\text{Mg(OH)}_2$  (ICDD No. 01-074-2220), respectively<sup>2</sup>. Two different MgO phases were detected. The MgO phase at  $43.0^\circ$  corresponds to the cubic structure with lattice constants  $a$  of 0.422 nm (ICDD No. 01-087-0653)<sup>3</sup> and another MgO peak at  $48.4^\circ$  corresponds to a cubic structure with lattice constants  $a$  of 0.384 nm (JCPDS card No 96-901-3242)<sup>4</sup>. The XRD peak at  $2\theta$  of  $35.7$  corresponds to the (311) plane of  $\text{Fe}_3\text{O}_4$  (ICDD No. 01-075-0449)<sup>5</sup>, which should be attributed to the contamination from the milling vessel.

## Figures

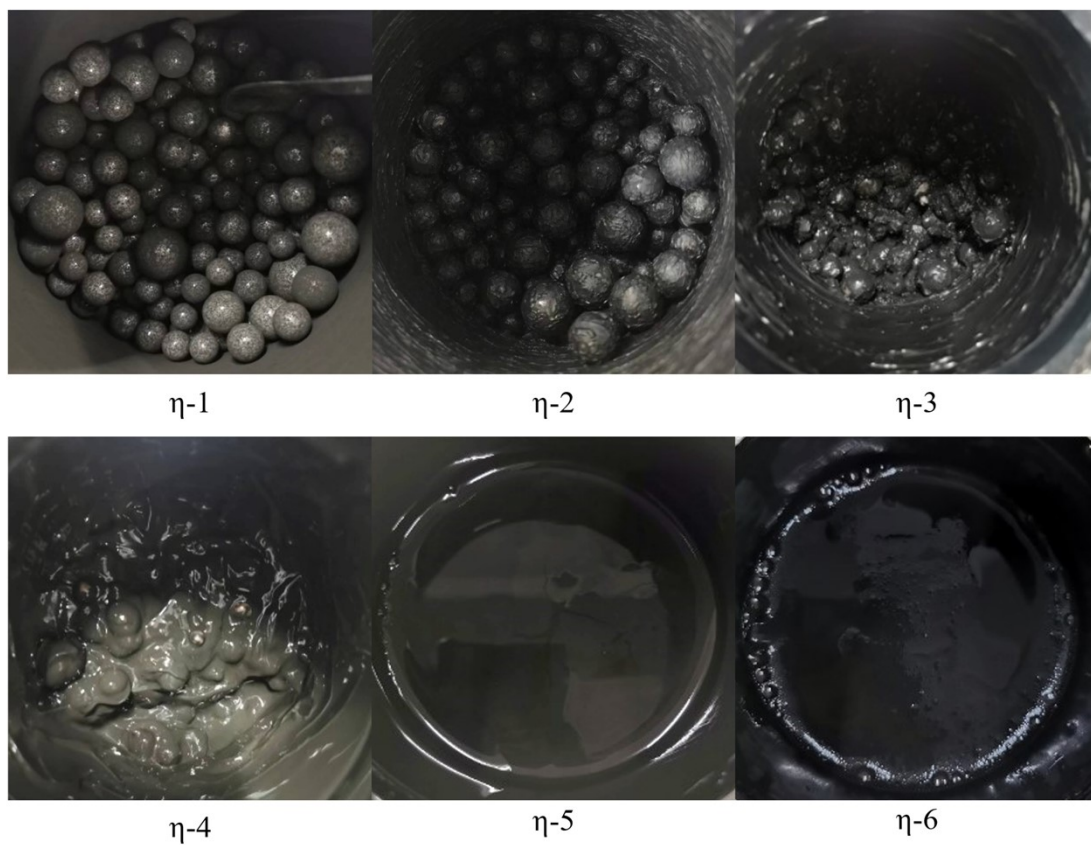

Fig. S1 The photographs of slurry in the milling vessel after ball milling for experiments in group  $\eta$ .

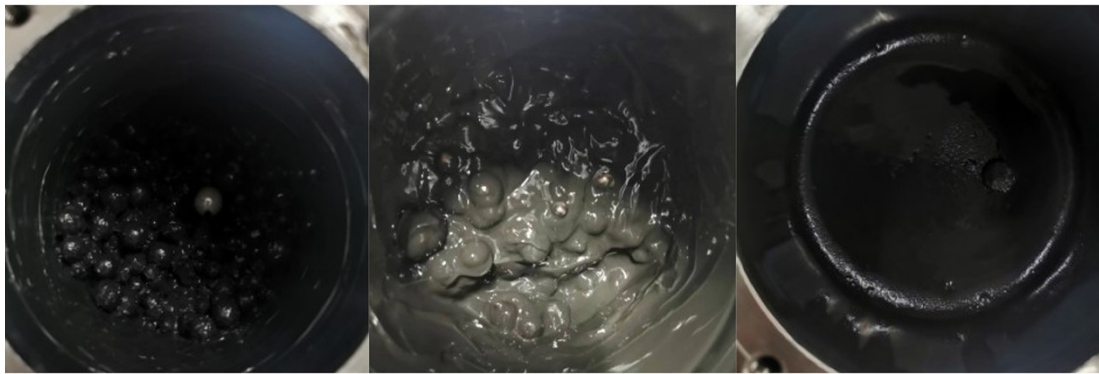

BPR-1

BPR-2

BPR-3

Fig. S2 The photographs of slurry in milling vessel after ball milling for experiments in group BPR.

## Tables

Table S1 The ratio of milling balls: Diameter and wt% of grinding ZrO<sub>2</sub> balls used.

| Ball diameter (mm) | Weight ratio (%) |
|--------------------|------------------|
| 15                 | 10               |
| 12                 | 15               |
| 10                 | 21.5             |
| 8.5                | 27.1             |
| 5                  | 13.2             |
| 3                  | 13.2             |

Table S2 Measured particle size (nm) of ten individual particles in SEM images for as-prepared samples in group T.

| Numbering of particle | Sample name |       |       |       |       |
|-----------------------|-------------|-------|-------|-------|-------|
|                       | T-1         | T-2   | T-3   | T-4   | T-5   |
| 1                     | 124.1       | 103.0 | 114.1 | 192.6 | 81.4  |
| 2                     | 149.1       | 86.9  | 238.0 | 95.7  | 154.3 |
| 3                     | 143.0       | 80.9  | 177.5 | 76.6  | 84.1  |
| 4                     | 198.4       | 132.2 | 102.2 | 136.7 | 121.6 |
| 5                     | 175.9       | 135.9 | 179.9 | 94.1  | 96.6  |
| 6                     | 107.5       | 149.3 | 100.1 | 197.6 | 85.0  |
| 7                     | 186.7       | 312.1 | 112.0 | 77.1  | 102.2 |
| 8                     | 122.1       | 143.3 | 112.2 | 125.4 | 128.5 |
| 9                     | 237.2       | 149.1 | 103.0 | 102.2 | 88.7  |
| 10                    | 300.0       | 89.2  | 117.6 | 79.7  | 105.4 |
| Ave. particle size    | 174.4       | 138.2 | 135.7 | 117.8 | 104.8 |

Table S3 Element analysis from EDS

| Element | Atomic % | Atomic %<br>Error | Weight % | Weight %<br>Error | Net Counts |
|---------|----------|-------------------|----------|-------------------|------------|
| Mg      | 2.9      | 0.0               | 4.3      | 0.1               | 12 263     |
| Co      | 5.9      | 0.1               | 21.2     | 0.4               | 12 648     |

Table S4 Measured grain size (nm) of ten individual grains in TEM image for T-4 sample.

| Numbering of particle | T-4  |
|-----------------------|------|
| 1                     | 19.4 |
| 2                     | 44.9 |
| 3                     | 18.0 |
| 4                     | 13.7 |
| 5                     | 12.8 |
| 6                     | 23.7 |
| 7                     | 10.4 |
| 8                     | 10.6 |
| 9                     | 23.1 |
| 10                    | 8.6  |
| Ave. grain size       | 18.5 |



Table S5 Coulomb efficiency calculated by galvanostatic discharge at different current densities for samples in group T.

| Sample Name | Coulomb Efficiency at 0.1 A/g | Coulomb Efficiency at 0.5 A/g | Coulomb Efficiency at 1.0 A/g | Coulomb Efficiency at 2.0 A/g | Coulomb Efficiency at 5.0 A/g |
|-------------|-------------------------------|-------------------------------|-------------------------------|-------------------------------|-------------------------------|
| T-1         | 92.0%                         | 87.3%                         | 92.1%                         | 91.2%                         | 91.0%                         |
| T-2         | 93.7%                         | 91.2%                         | 85.7%                         | 85.6%                         | 89.9%                         |
| T-3         | 94.6%                         | 90.5%                         | 92.5%                         | 92.2%                         | 90.3%                         |
| T-4         | 97.3%                         | 93.9%                         | 90.5%                         | 92.6%                         | 90.5%                         |
| T-5         | 90.9%                         | 93.3%                         | 92.7%                         | 88.8%                         | 80.1%                         |

Table S6 Specific charge (C/g) calculated by galvanostatic discharge at different current densities for samples in group T.

| Sample Name | Specific Charge at 0.1 A/g | Specific Charge at 0.5 A/g | Specific Charge at 1.0 A/g | Specific Charge at 2.0 A/g | Specific Charge at 5.0 A/g |
|-------------|----------------------------|----------------------------|----------------------------|----------------------------|----------------------------|
| T-1         | 144.3                      | 102.4                      | 95.0                       | 82.4                       | 65.5                       |
| T-2         | 240.3                      | 187.3                      | 140.6                      | 115.6                      | 88.5                       |
| T-3         | 247.9                      | 190.0                      | 171.7                      | 151.2                      | 121.5                      |
| T-4         | 266.3                      | 235.1                      | 194.8                      | 175.2                      | 138.5                      |
| T-5         | 155.6                      | 138.8                      | 125.3                      | 106.2                      | 76.5                       |

Table S7 The specific charge, single batch production capacity, and the synthesis temperature of  $\text{MgCo}_2\text{O}_4$  in this work and previous literature.

| Morphology                                          | Preparing Method | Specific Charge (C/g) | Single Batch Production Capacity (g) | Highest Temperature in Synthesis Process (°C) | Ref       |
|-----------------------------------------------------|------------------|-----------------------|--------------------------------------|-----------------------------------------------|-----------|
| $\text{MgCo}_2\text{O}_4$ nanofibers                | Electrospun      | 84 at 0.5 A/g         | 0.1                                  | 700                                           | 6         |
| $\text{MgCo}_2\text{O}_4$ spheres                   | Molten salt      | 160 at 0.5 A/g        | Unknown                              | 280                                           | 7         |
| $\text{MgCo}_2\text{O}_4$ nanosheets                | Hydrothermal     | 136 at 1 A/g          | 0.2                                  | 350                                           | 8         |
| Porous double-urchin-like $\text{MgCo}_2\text{O}_4$ | Hydrothermal     | 254 at 2 A/g          | 0.4                                  | 350                                           | 9         |
| $\text{MgCo}_2\text{O}_4$ nanoflower                | Hydrothermal     | 178 at 1 A/g          | 0.2                                  | 400                                           | 10        |
| $\text{MgCo}_2\text{O}_4$ nanoflakes                | Solvothermal     | 376 at 1 A/g          | 0.2                                  | 400                                           | 11        |
| $\text{MgCo}_2\text{O}_4$ micro flowers             | Solvothermal     | 313 at 1 A/g          | 0.2                                  | 350                                           | 12        |
| $\text{MgCo}_2\text{O}_4$ particle                  | Ball milling     | 266 at 0.1 A/g        | 100                                  | 105                                           | This work |

## References

- 1 Y. Wang, J. Sun, S. Li, Y. Zhang, C. Xu and H. Chen, Hydrothermal synthesis of flower-like  $\text{MgCo}_2\text{O}_4$  porous microstructures as high-performance electrode material for asymmetric supercapacitors, *J. Alloys Compd.*, 2020, **824**, 153939–153950.
- 2 S. A. Walling, S. A. Bernal, L. J. Gardner, H. Kinoshita and J. L. Provis, Phase Formation and Evolution in  $\text{Mg}(\text{OH})_2$ -Zeolite Cements, *Ind. Eng. Chem. Res.*, 2018, **57**, 2105–2113.
- 3 Q. Gu, G. Liu, H. Li, Q. Jia, F. Zhao and X. Liu, Synthesis of  $\text{MgO}$ - $\text{MgAl}_2\text{O}_4$  refractory aggregates for application in  $\text{MgO}$ -C slide plate, *Ceram. Int.*, 2019, **45**, 24768–24776.
- 4 M. Saket, R. Amini, P. Kardar and M. Ganjaee, The chemical treatment of the AZ31-Magnesium alloy surface by a high-performance corrosion protective praseodymium (III)-based film, *Mater. Chem. Phys.*, 2021, **260**, 124113–124125.
- 5 W.-W. Liu, A. Aziz, S.-P. Chai, A. Rahman Mohamed, C.-T. Tye and P. Selatan, Preparation of iron oxide nanoparticles supported on magnesium oxide for producing high-quality single-walled carbon nanotubes, *New Carbon Materials*, 2011, **26**, 225–261.
- 6 M. M. Ghaziani, J. Mazloom and F. E. Ghodsi, Electrospun  $\text{MgCo}_2\text{O}_4$  nanofibers as an efficient electrode material for pseudocapacitor applications: Effect of calcination temperature on electrochemical performance, *Journal of Physics and Chemistry of Solids*, 2021, **152**, 109981–109991.
- 7 S. G. Krishnan, M. V. Reddy, M. Harilal, B. Vidyadharan, I. I. Misnon, M. H. A. Rahim, J. Ismail and R. Jose, Characterization of  $\text{MgCo}_2\text{O}_4$  as an electrode for high performance supercapacitors, *Electrochim. Acta*, 2015, **161**, 312–321.
- 8 H. Wang, N. Mi, S. Sun, W. Zhang and S. Yao, Oxygen vacancies enhancing capacitance of  $\text{MgCo}_2\text{O}_4$  for high performance asymmetric supercapacitors, *J. Alloys Compd.*, 2021, **869**, 159294–159301.
- 9 J. Xu, L. Wang, J. Zhang, J. Qian, J. Liu, Z. Zhang, H. Zhang and X. Liu, Fabrication of porous double-urchin-like  $\text{MgCo}_2\text{O}_4$  hierarchical architectures for high-rate supercapacitors, *J. Alloys Compd.*, 2016, **688**, 933–938.
- 10 S. G. Krishnan, M. Harilal, I. I. Misnon, M. V. Reddy, S. Adams and R. Jose, Effect of processing parameters on the charge storage properties of  $\text{MgCo}_2\text{O}_4$  electrodes, *Ceram. Int.*, 2017, **43**, 12270–12279.
- 11 E. Bao, X. Ren, R. Wu, X. Liu, H. Chen, Y. Li and C. Xu, Porous  $\text{MgCo}_2\text{O}_4$  nanoflakes serve as electrode materials for hybrid supercapacitors with excellent performance, *J. Colloid Interface Sci.*, 2022, **625**, 925–935.
- 12 Y. Wang, S. Li, J. Sun, Y. Zhang, H. Chen and C. Xu, Simple solvothermal synthesis of magnesium cobaltite microflowers as a battery grade material with high electrochemical performances, *Ceram. Int.*, 2019, **45**, 14642–14651.
